# Supplementary material for: Improving Stability of Roll-to-Roll (R2R) Gravure-Printed Carbon Nanotube-Based Thin Film Transistors via R2R Plasma-Enhanced Chemical Vapor-Deposited Silicon Nitride
Source: MDPI journal article supplement (doi:10.3390/nano13030559), 2023-01-30
Supplement: s1 [file s1]

# Improving Stability of Roll-to-Roll (R2R) Gravure-Printed Carbon Nanotube-Based Thin Film Transistors via R2R Plasma-Enhanced Chemical Vapor-Deposited Silicon Nitride

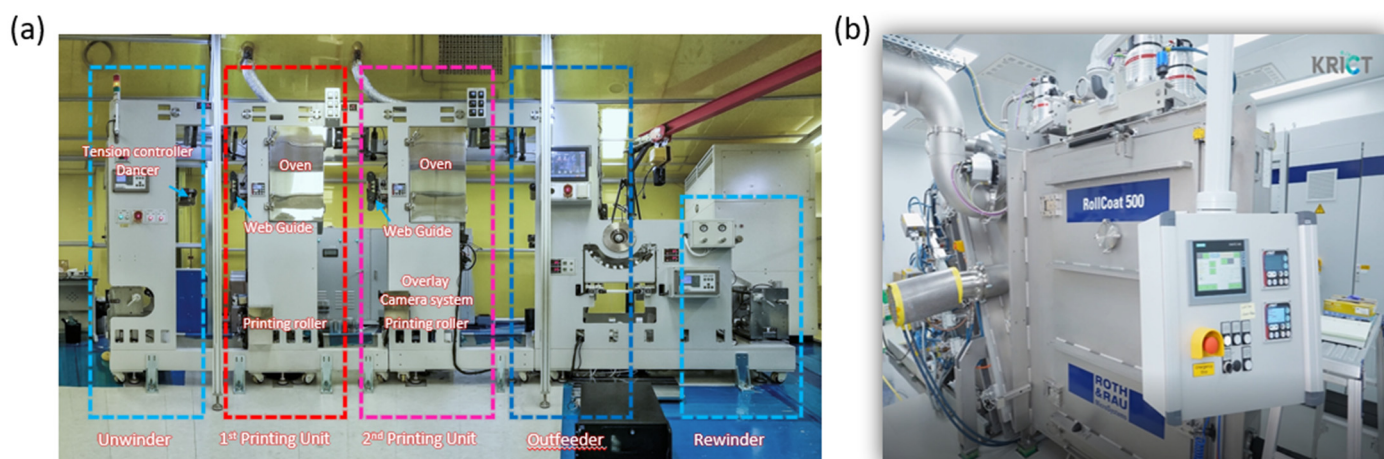

**Figure S1.** (a) R2R gravure printing system with two printing units. (b) R2R plasma-enhanced chemical vapor deposition system.

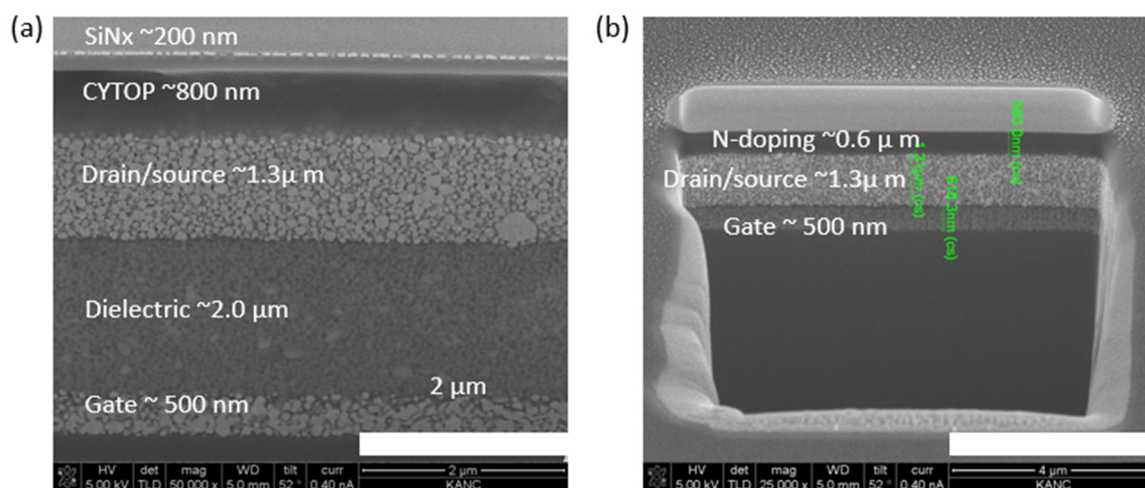

**Figure S2.** (a) The cross-sectional scanning electron microscope image of R2R printed p-type SWCNT-TFT with SiNx passivation layer. (b) The cross-sectional scanning electron microscope image of R2R printed n-type SWCNT-TFT with an n-doping layer.

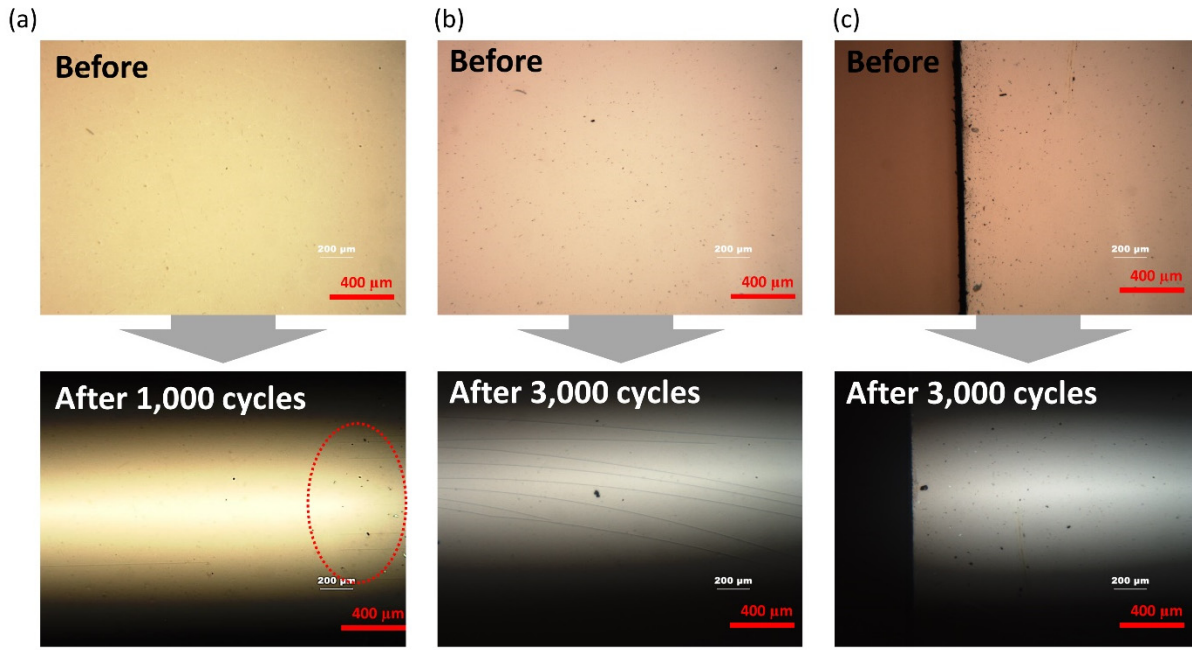

**Figure S3.** Optical images of before and after bending test for SiNx layer on PET with thickness (a) 400 nm (bending test for 1,000 cycles) , (b) 300 nm (bending test for 3,000 cycles) and, (c) 200 nm (bending test for 3,000 cycles).

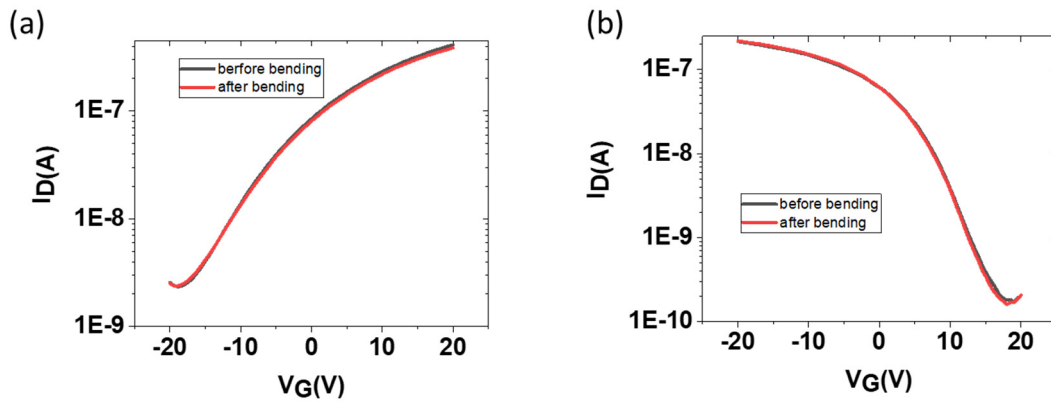

**Figure S4.** Transfer characteristics of SiNx passivated (a) n-type and, (b) p-type pSWCNT-TFTs before and after bending tests.

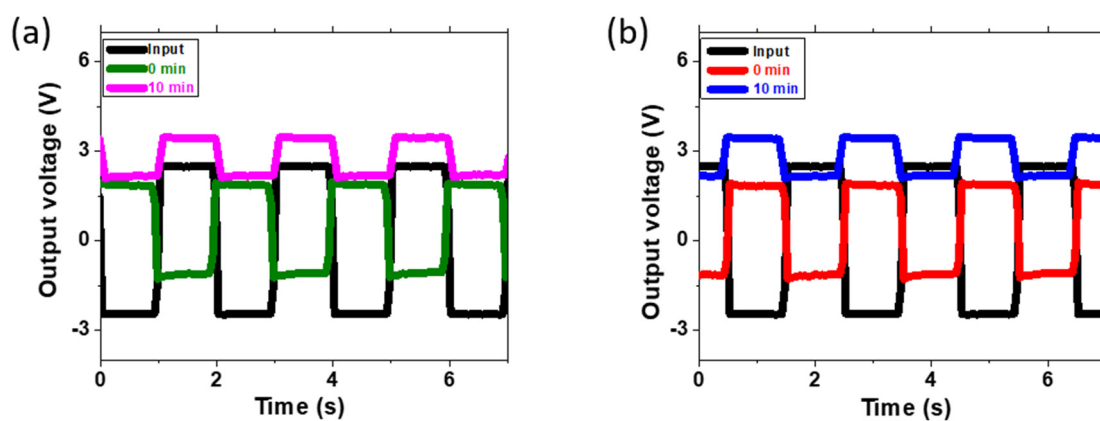

**Figure S5.** (a) Inverting bare property R2R printed p-type pSWCNT-TFT along with time. (b) Inverting bare property R2R printed n-type pSWCNT-TFT along with time.

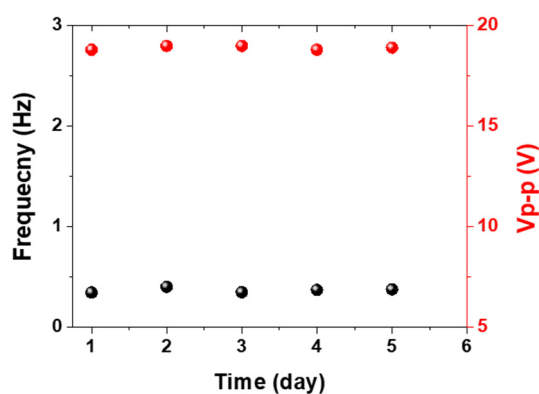

**Figure S6.** The output frequency with  $V_{p-p}$  from the SiNx passivated 1-bit code generator.

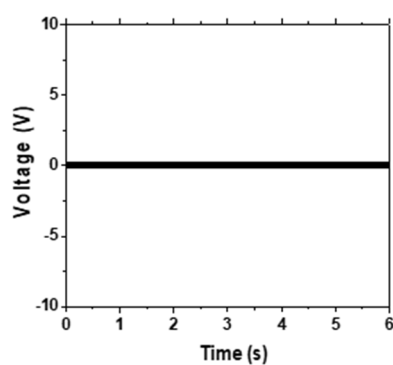

**Figure S7.** The output characteristics of a non-passivated 1-bit code generator at 85/85 test for 24 hours.
